# Supplementary material
Source: publisher site journal article supplement (https://www.spandidos-publications.com/3162/downloadSupplementary)

Figure S1. RT-qPCR was utilized to investigate the expression of miR-411-3p in CFPAC-1 and SW1990 cells transfected with NC mimic or miR-411-3p mimic. \*\*\*P<0.001 vs. NC mimic.

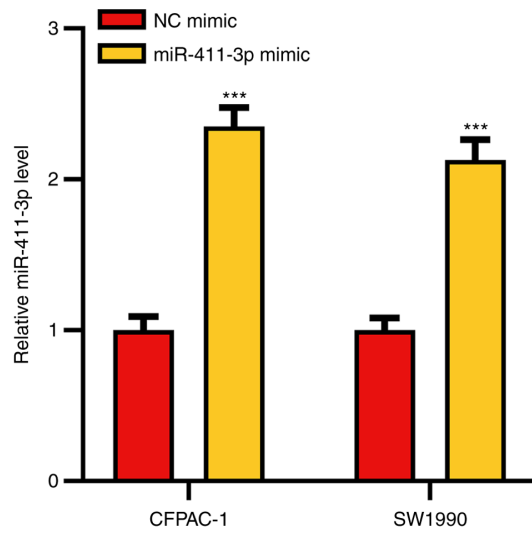

Figure S2. RT-qPCR was utilized to investigate the expression of miR-411-3p in CFPAC-1 and SW1990 cells transfected with NC inhibitor or miR-411-3p inhibitor. \*\*\*P<0.001 vs. NC inhibitor.

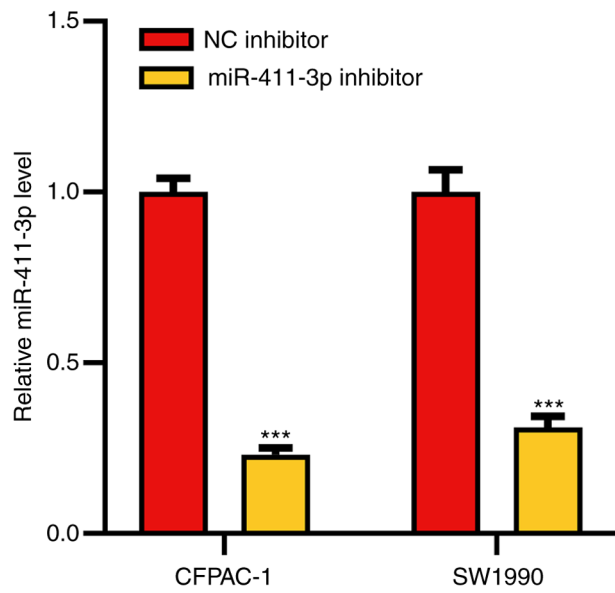

Figure S3. RT-qPCR was utilized to investigate the expression of HIF- $\alpha$  in CFPAC-1 and SW1990 cells transfected with NC or HIF-1 $\alpha$  overexpression plasmid. \*\*\*P<0.001 vs. NC. HIF-1 $\alpha$ , hypoxia inducible factor-1 $\alpha$ .

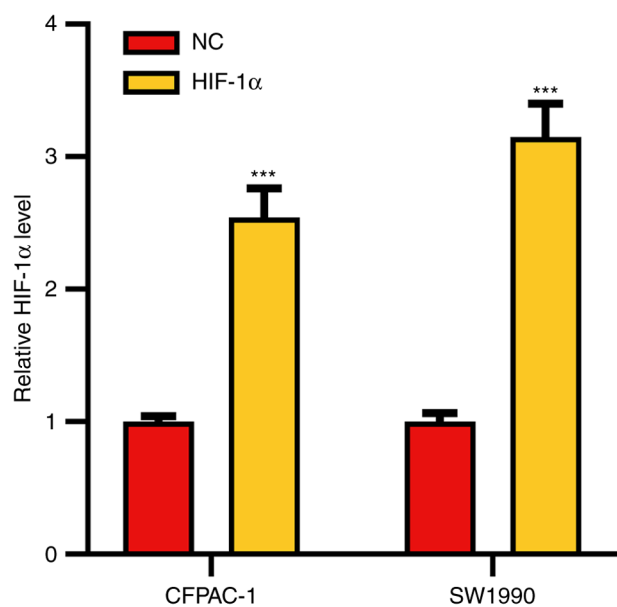

Supplement: Supplementary file [file downloadSupplementary]
